# Supplementary material for: A human iPSC-derived hepatocyte screen identifies compounds that inhibit production of Apolipoprotein B
Source: PubMed Central journal article supplement (PMC10125972; doi:10.1038/s42003-023-04739-9), 2023-04-24
Supplement: 42003_2023_4739_MOESM2_ESM.pdf [file 42003_2023_4739_MOESM2_ESM.pdf]

## **Description of Additional Supplementary Files**

File Name: Supplementary Data

Description: Compressed file containing all of the source data used to generate the graphs presented in the main figures in the paper along with original blots for Figure 3.
